# Supplementary material for: A Novel Hybrid Membrane Process Coupled with Freeze Concentration for Phosphorus Recovery from Cheese Whey
Source: MDPI journal article supplement (doi:10.3390/membranes13040450), 2023-04-21
Supplement: s1 [file s1]

Article

# A Novel Hybrid Membrane Process Coupled with Freeze Concentration for Phosphorus Recovery from Cheese Whey

Ipan Hidayat <sup>1</sup>, Lidia Paredes <sup>1,\*</sup>, Pablo M. Binder <sup>1</sup>, Nagore Guerra-Gorostegi <sup>1</sup>, Mabel Mora <sup>1</sup>, Sergio Ponsá <sup>1</sup>, Darren L. Oatley-Radcliffe <sup>2</sup> and Laia Llenas <sup>1</sup>

<sup>1</sup> BETA Technological Center (TECNIO Network), University of Vic—Central University of Catalonia (UVic-UCC), Carretera de Roda 70, 08500 Vic, Spain

<sup>2</sup> Energy Safety Research Institute (ESRI), College of Engineering, Swansea University, Bay Campus, Swansea, Wales SA1 8EN, UK

\* Correspondence: lidia.paredes@uvic.cat

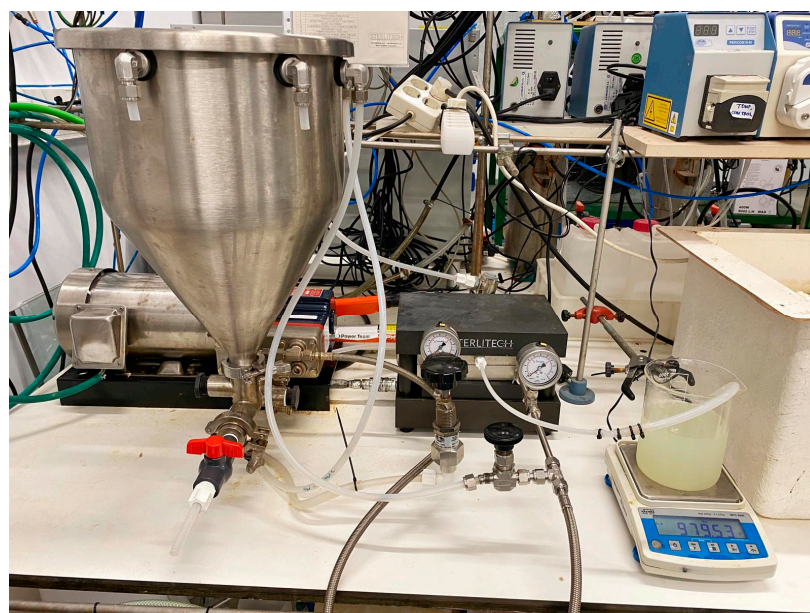

**Figure S1.** The real picture of apparatus used of membrane system.

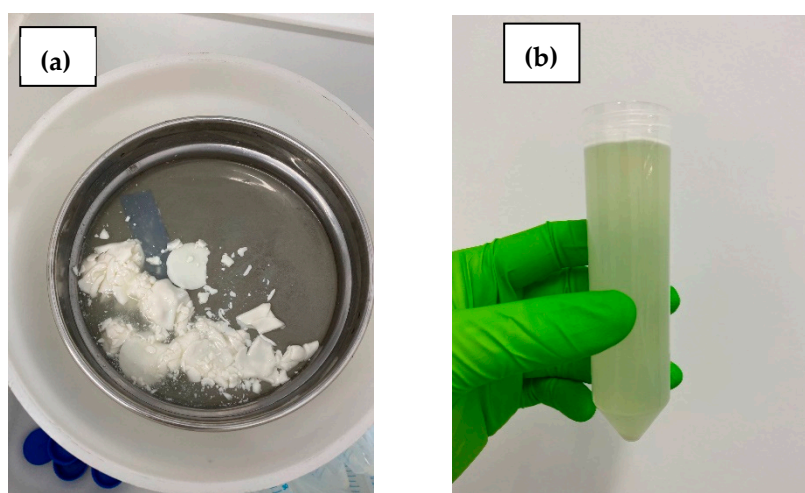

**Figure S2.** Precipitation following lactic acid acidification (a) and supernatant of the centrifugation process (b).

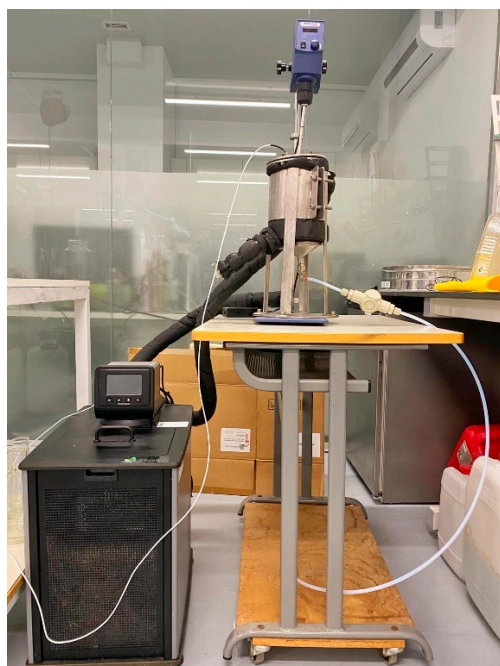

**Figure S3.** The real picture of apparatus used of progressive freeze concentration.

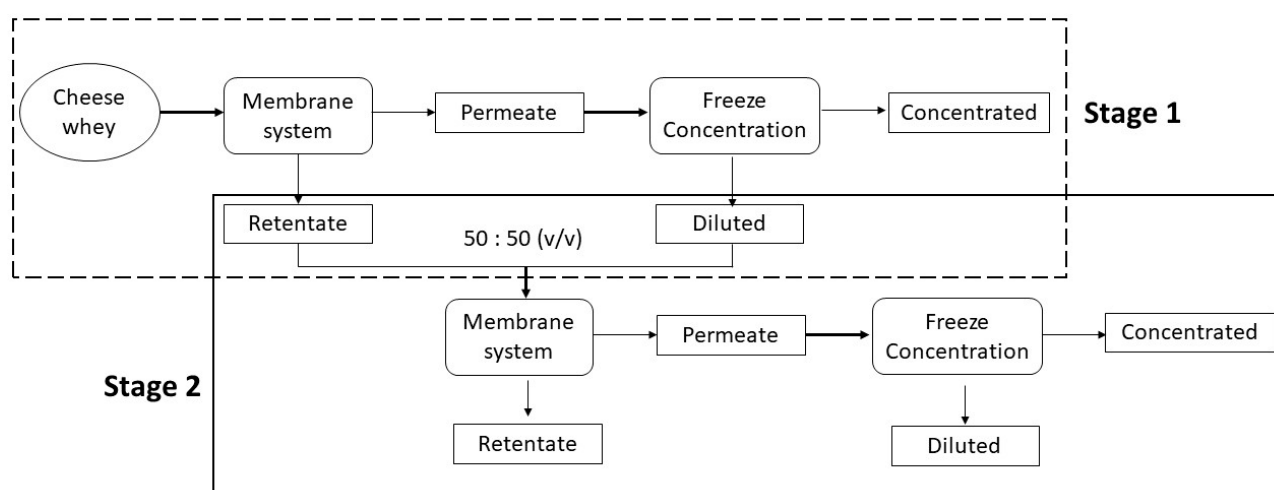

**Figure S4.** Flowchart of the two-stages of cheese whey valorisation using coupled technology of membrane system and freeze concentration.
